# Supplementary material
Source: PubMed Central journal article supplement (PMC8741006)
Supplement: 6644_2_supp_60628_qktr2l.pdf [file 6644_2_supp_60628_qktr2l.pdf]

## Supplemental Material

**Title:** Identification of Novel Biomarkers and Pathways for Coronary Artery Calcification in Non-diabetic Patients on Hemodialysis Using Metabolomic Profiling

### AUTHORS

Wei Chen, MD, MS;<sup>1,2</sup> Jessica Fitzpatrick, PhD;<sup>3</sup> Stephen M. Sozio, MD, MHS, MEHP;<sup>4,5</sup> Bernard G. Jaar, MD, MPH;<sup>4,5,6</sup> Michelle M. Estrella, MD, MHS;<sup>7,8</sup> Dario F. Riascos-Bernal, MD, PhD;<sup>1,9</sup> Tong Tong Wu, PhD;<sup>10</sup> Yunping Qiu, PhD;<sup>11</sup> Irwin J. Kurland, MD, PhD;<sup>1,11</sup> Ruth F. Dubin, MD;<sup>12</sup> Yabing Chen, PhD<sup>13</sup> Rulan S. Parekh, MD, MS;<sup>3,5</sup> David A. Bushinsky, MD;<sup>2</sup> Nicholas E.S. Sibinga, MD<sup>1,9</sup>

### Table of Contents

#### Supplemental Methods

#### Supplemental Tables

Table S1. Comparing baseline characteristics of study population with unselected participants

Table S2. Summary of metabolites that differed between cases and controls

Table S3. Tobit regression of log-transformed CAC score

Table S4. Metabolites analyzed in arginine/proline metabolism, urea cycle and bile acid synthesis

Table S5. Correlations of bile acid synthesis and arginine/proline metabolism pathways and their key metabolites with serum markers of mineral metabolism (Ca, Phos, Mg, PTH, FGF23, klotho), circulating inhibitors of calcification (osteoprotegerin, dp-ucMGP, fetuin-A, CPP2, T<sub>50</sub>) and inflammation (CRP).

#### Supplemental Figures

Figure S1. a) Distribution of coefficients of variation (CVs) for all metabolites measured (m=452). b) Pathways and number of metabolites (m=247) analyzed.

Figure S2. Volcano plot identified metabolites that differed between cases and controls.

Figure S3. Synchronized 3-dimensional plot of partial least squares-discriminant analyses. Cases are in green and controls are in red.

Figure S4. Top 15 serum metabolites listed by their variable importance in projection (VIP) scores using partial least squares discriminant analyses.

Figure S5. Correlation among 3 bile acids.

Figure S6. Scree plots of arginine/proline metabolism (m=15), urea cycle (m=10) and bile acid synthesis (m=12).

Figure S7. Bile acid synthesis and intracellular arginine and proline metabolism, simplified version.

#### References

## **SUPPLEMENTAL METHODS**

### **Selection of study population**

In the PACE cohort (n=568), diabetes status and blood samples were not available in 158 participants because these participants did not complete the study visit. Every participant in the PACE cohort had hypertension. In current study, we compared the serum metabolites of non-diabetics with a CAC score >100 (case) with non-diabetics with a CAC score of 0 (control). Compared to the study population, participants with diabetes were older ( $56 \pm 11$  vs.  $53 \pm 16$  years) and more likely to have CAD (45% vs. 27%; Table S1). Participants without available CAC scores (76% had diabetes) were more likely to have CAD (40%) compared to the study population. Non-diabetic participants with a CAC score between 0-100 had similar demographic characteristics with the study population.

### **Details on CAC measurement**

CAC was measured at the baseline visit by computed tomography (Toshiba Aquilon One, Japan), acquired prospectively in synchrony with the electrocardiogram at 70-80% RR interval, near the end of diastole and before atrial contraction.<sup>1</sup> Coronary calcium was quantified by Agatston score. CAC scores were assessed and then validated by a second reviewer.

### **Details on the measurement of covariates**

Potential confounders included demographics, education level, smoking history, comorbidities, medication use, dialysis access, and dialysis clearance. Participants' demographic factors (age, sex, and race), education level, smoking history, and medication use were self-reported. Comorbidities including diabetes mellitus, coronary artery disease, and hypertension were adjudicated by a committee of physicians. Dialysis clearance was assessed by single-pool Kt/V (spKt/V).

We also measured serum markers of mineral metabolism, circulating inhibitors of cardiovascular calcification, calciprotein particle size and transformation time, and C-reactive protein. All measurements were performed in the same serum samples as the metabolomics, except for serum

calcium, phosphorous, and intact parathyroid hormone (PTH) levels, which were averaged from 3-months of lab values collected before a dialysis session. C-terminal fibroblast growth factor (FGF23, CV=13%; Immotopics, San Clemente, CA, USA) and soluble klotho (CV=2.3%; Immuno-biological Laboratories, Takasaki, Japan) were measured using enzyme-linked immunosorbent assays (ELISA). For circulating inhibitors of cardiovascular calcification, osteoprotegerin<sup>2</sup> (CV=9%; Alpaco Diagnostics, Salem, NH, USA), dephosphorylated and uncarboxylated matrix glutamate (Gla) protein (dp-ucMGP)<sup>3,4</sup> (CV=11%; VitaK BV, Maastricht, Netherlands), and fetuin-A<sup>5</sup> (CV=18%; Epitope Diagnostics, San Diego, CA, USA) were measured using ELISA. The size of secondary calciprotein particle aggregates (CPP2; CV=13%) and the time of transformation from primary to secondary calciprotein particle ( $T_{50}$ ; CV=10%) were measured using dynamic light scattering as previously described.<sup>6</sup> High sensitivity C-reactive protein (CV=7%; BNII Nephelometer; Siemens Healthcare, Germany) was measured using ELISA.

## SUPPLEMENTAL TABLES

**Table S1.** Comparing baseline characteristics of study population with unselected participants

|                                                    | Study population<br>(n=99) | Diabetes<br>(n=239) | No CAC score<br>(n=291) | CAC score<br>between 0-100<br>& non-<br>diabetics<br>(n=31) |
|----------------------------------------------------|----------------------------|---------------------|-------------------------|-------------------------------------------------------------|
| Age, year<br>(missing=200)                         | 53 ± 16                    | 56 ± 11*            | 56 ± 12                 | 52 ± 11                                                     |
| Women, n (%)<br>(missing=158)                      | 38 (38)                    | 98 (41)             | 132 (42)                | 16 (52)                                                     |
| African American, n (%)<br>(missing=158)           | 71 (72)                    | 169 (71)            | 223 (71)                | 23 (74)                                                     |
| Diabetes mellitus, n (%)<br>(missing=158)          | 0 (0)                      | 239 (100)*          | 239 (76)*               | 0 (0)                                                       |
| Hypertension, n (%)<br>(missing=158)               | 99 (100)                   | 239 (100)           | 316 (100%)              | 31 (100)                                                    |
| Coronary artery disease, n<br>(%)<br>(missing=158) | 27 (27)                    | 107 (45)*           | 127 (40)*               | 6 (19)                                                      |

\*p<0.05 compared to the study population. Age is provided as mean ± standard deviation and were tested using two-sample t-test. The rest are categorical variables, which are presented as absolute number with percentage and were tested with chi-square test.

**Table S2.** Summary of metabolites that differed between cases and controls

|                                                                | Fold difference | Unadjusted p | Volcano plot | PLS-DA | Demographics-adjusted p |
|----------------------------------------------------------------|-----------------|--------------|--------------|--------|-------------------------|
| Arginine and proline metabolism                                |                 |              |              |        |                         |
| Arginine                                                       | 1.14            | 0.03         |              | x      | 0.68                    |
| Ornithine                                                      | 1.17            | 0.008        |              | x      | 0.57                    |
| Succinic acid                                                  | 1.44            | 0.005        |              | x      | 0.21                    |
| Glycine and serine metabolism                                  |                 |              |              |        |                         |
| Betaine                                                        | 1.30            | 0.0047       | x            | x      | 0.17                    |
| Tyrosine metabolism                                            |                 |              |              |        |                         |
| L-tyrosine                                                     | 1.19            | 0.007        |              | x      | 0.49                    |
| Methionine metabolism                                          |                 |              |              |        |                         |
| N-formyl-L-methionine                                          | 2.82            | 0.004        | x            | x      | 0.18                    |
| Amino acid degradation                                         |                 |              |              |        |                         |
| Methylguanidine                                                | 0.62            | 0.005        |              | x      | 0.76                    |
| Fatty acid metabolism                                          |                 |              |              |        |                         |
| Suberic acid                                                   | 1.25            | 0.004        | x            | x      | 0.16                    |
| Nonadecanoic acid                                              | 1.10            | 0.02         |              | x      | 0.40                    |
| Bile acid synthesis                                            |                 |              |              |        |                         |
| Chenodeoxycholic acid                                          | 2.33            | 0.002        | x            | x      | 0.049                   |
| Deoxycholic acid                                               | 2.32            | 0.001        | x            | x      | 0.04                    |
| Glycolithocholic acid                                          | 2.44            | 0.004        | x            | x      | 0.04                    |
| Creatine phosphate pathway: muscle breakdown                   |                 |              |              |        |                         |
| Creatinine                                                     | 0.77            | 0.003        | x            | x      | 0.68                    |
| Glycolysis, glyoxylate and tricarboxylic acid cycle metabolism |                 |              |              |        |                         |
| Citric acid                                                    | 1.25            | 0.002        | x            | x      | 0.13                    |
| Food component                                                 |                 |              |              |        |                         |
| Lumazine                                                       | 1.22            | 0.002        | x            | x      | 0.49                    |

Abbreviation: PLS-DA, partial least squares discriminant analysis

Using Mann-Whitney U test and a set threshold of fold difference (1.0) and raw p-value (0.005), we identified 9 metabolites that differed between cases and controls and showed them in the volcano plot. Using PLS-DA, we identified top 15 metabolites based on VIP scores. All 9 metabolites revealed by the volcano plot were also identified by the PLS-DA. After adjusting for demographics (age, sex, and race), only 3 bile acids remained associated with CAC status ( $p < 0.05$ ).

**Table S3.** Tobit regression of log-transformed CAC score\*

| <b>Metabolites<sup>#</sup></b>        |                      |        |                       |       |                      |      |
|---------------------------------------|----------------------|--------|-----------------------|-------|----------------------|------|
|                                       | Unadjusted           |        | Demographics-adjusted |       | Fully adjusted       |      |
|                                       | Coefficient (95% CI) | p      | Coefficient (95% CI)  | p     | Coefficient (95% CI) | p    |
| Chenodeoxycholic acid                 | 0.27 (0.07 – 0.46)   | 0.01   | 0.15 (0.03 – 0.27)    | 0.02  | 0.13 (0.01 – 0.25)   | 0.03 |
| Deoxycholic acid                      | 0.28 (0.06 – 0.50)   | 0.01   | 0.16 (0.04 – 0.29)    | 0.01  | 0.14 (-0.001 – 0.28) | 0.05 |
| Glycolithocholic acid (per 0.01 unit) | 0.10 (0.04 – 0.16)   | 0.01   | 0.05 (0.01 – 0.09)    | 0.01  | 0.01 (-0.05 – 0.06)  | 0.74 |
| <b>Pathways<sup>#</sup></b>           |                      |        |                       |       |                      |      |
|                                       | Unadjusted           |        | Demographics-adjusted |       | Fully adjusted       |      |
|                                       | Coefficient (95% CI) | p      | Coefficient (95% CI)  | p     | Coefficient (95% CI) | p    |
| Arginine/proline metabolism           | 0.91 (0.19 – 1.62)   | 0.01   | 0.61 (0.12 – 1.11)    | 0.02  | 0.58 (0.11 – 1.05)   | 0.02 |
| Urea cycle                            | 1.61 (0.89 – 2.34)   | <0.001 | 0.65 (0.003 – 1.29)   | 0.049 | 0.65 (0.02 – 1.29)   | 0.04 |
| Bile acid synthesis                   | -0.02 (-0.75 – 0.71) | 0.96   | 0.11 (-0.38 – 0.61)   | 0.65  | 0.22 (-0.29 – 0.73)  | 0.40 |

\*CAC score was log-transformed after adding 1 (i.e.  $\ln(\text{CAC score} + 1)$ ). <sup>#</sup>per 1 unit higher in relative intensity unless otherwise specified for analyses of metabolites; per 1 unit higher in the first principal component score of each pathway for analyses of pathways.

Demographics included age, sex, and race. Full models were adjusted for demographics, coronary artery disease, use of calcium-based phosphate binder, renin-angiotensin-aldosterone system blockage and statin for all 3 bile acids and bile acid synthesis pathway, and were adjusted for demographics and statin use for arginine/proline metabolism and urea cycle pathways.

**Table S4.** Metabolized analyzed in arginine/proline metabolism, urea cycle and bile acid synthesis

| Arginine and proline metabolism<br>(m=15) |         | Urea Cycle<br>(m=10) |         | Bile acid synthesis<br>(m=12) |         |
|-------------------------------------------|---------|----------------------|---------|-------------------------------|---------|
| Metabolites                               | HMDB ID | Metabolites          | HMDB ID | Metabolites                   | HMDB ID |
| L-arginine*                               | 0000517 | L-arginine*          | 0000517 | Glycine                       | 0000123 |
| Ornithine*                                | 0000214 | Ornithine*           | 0000214 | Glycocholic acid              | 0000138 |
| Citrulline*                               | 0000904 | L-glutamine*         | 0000641 | Palmitic acid                 | 0000220 |
| L-aspartic acid                           | 0000191 | Citrulline*          | 0000904 | Taurine                       | 0000251 |
| Fumaric acid                              | 0000134 | L-alanine            | 0000161 | Chenodeoxycholic acid*        | 0000518 |
| Oxalacetic acid                           | 0000223 | L-aspartic acid      | 0000191 | Glycochenodeoxycholic acid    | 0000637 |
| L-glutamic acid                           | 0000148 | Fumaric acid         | 0000134 | Taurochenodeoxycholic acid    | 0000951 |
| Succinic acid*                            | 0000254 | Oxalacetic acid      | 0000223 | Deoxycholic acid*             | 0000626 |
| 4-hydroxy-L-proline*                      | 0006055 | Pyruvic acid         | 0000243 | Glycodeoxycholic acid         | 0000631 |
| S-adenosylmethionine                      | 0001185 | L-glutamic acid      | 0000148 | Taurodeoxycholic acid         | 0000896 |
| Flavin adenine dinucleotide               | 0001248 |                      |         | Glycolithocholic acid*        | 0000698 |
| Glycine                                   | 0000123 |                      |         | Flavin adenine dinucleotide   | 0001248 |
| L-proline                                 | 0000162 |                      |         |                               |         |
| Creatine                                  | 0000064 |                      |         |                               |         |
| S-adenosylhomocysteine                    | 0000939 |                      |         |                               |         |

\*p<0.05, comparing cases with controls for each metabolite. Abbreviation: HMDB, human metabolome database identification

**Table S5.** Correlations of bile acid synthesis and arginine/proline metabolism pathways and their key metabolites with serum markers of mineral metabolism (Ca, Phos, Mg, PTH, FGF23, klotho), circulating inhibitors of calcification (osteoprotegerin, dp-ucMGP, fetuin-A, CPP2, T<sub>50</sub>) and inflammation (CRP).

|                                   | Ca     | Phos  | Mg     | PTH   | FGF23 | Klotho  | Osteoprotegerin | Dp-ucMGP | Fetuin-A | CPP2    | T50    | CRP    |
|-----------------------------------|--------|-------|--------|-------|-------|---------|-----------------|----------|----------|---------|--------|--------|
| Bile acid synthesis pathway       | -0.14  | 0.13  | 0.03   | 0.17  | 0.24* | -0.09   | 0.33**          | 0.03     | -0.08    | 0.17    | -0.23* | -0.15  |
| Glycocholic acid                  | -0.06  | 0.14  | -0.03  | 0.06  | 0.25* | -0.03   | 0.2*            | 0.04     | -0.01    | 0.1     | -0.12  | -0.17  |
| Chenodeoxycholic acid             | 0.03   | 0.05  | 0.08   | 0.07  | -0.12 | -0.17   | 0.09            | -0.11    | 0.07     | -0.02   | -0.05  | -0.24* |
| Glycochenodeoxycholic acid        | -0.25* | 0.08  | -0.001 | 0.12  | 0.16  | -0.06   | 0.29**          | 0.1      | -0.02    | 0.11    | -0.15  | -0.16  |
| Taurochenodeoxycholic acid        | -0.14  | 0.01  | 0.02   | 0.13  | 0.24* | 0.08    | 0.23*           | 0.08     | -0.03    | 0.11    | -0.16  | -0.14  |
| Deoxycholic acid                  | 0.02   | 0.06  | 0.08   | 0.09  | -0.11 | -0.17   | 0.08            | -0.09    | 0.07     | -0.02   | -0.03  | -0.22* |
| Glycodeoxycholic acid             | -0.25* | 0.09  | 0.01   | 0.11  | 0.16  | -0.06   | 0.28**          | 0.1      | -0.02    | 0.11    | -0.14  | -0.16  |
| Taurodeoxycholic acid             | -0.19  | 0.002 | 0.09   | 0.15  | 0.2   | 0.06    | 0.22*           | 0.08     | -0.08    | 0.14    | -0.15  | -0.17  |
| Glycolithocholic acid             | 0.11   | 0.12  | 0.16   | 0.23* | -0.03 | -0.08   | 0.03            | -0.14    | 0.15     | -0.05   | -0.02  | -0.23* |
|                                   |        |       |        |       |       |         |                 |          |          |         |        |        |
| Argine/proline metabolism pathway | -0.17  | 0.22* | 0.17   | 0.03  | 0.27* | -0.0002 | 0.33**          | 0.22*    | 0.1      | -0.04   | -0.03  | -0.15  |
| L-arginine                        | 0.08   | 0.1   | 0.05   | 0.01  | -0.06 | -0.15   | 0.05            | 0.07     | -0.04    | -0.01   | 0.001  | 0.23*  |
| Ornithine                         | -0.19  | 0.06  | 0.01   | -0.07 | 0.02  | -0.26*  | 0.44**          | 0.07     | -0.1     | 0.09    | -0.03  | -0.18  |
| Citrulline                        | 0.09   | 0.24* | 0.31** | 0.01  | 0.21* | -0.13   | 0.25*           | 0.05     | 0.08     | -0.001  | 0.06   | -0.13  |
| Succinic acid                     | 0.03   | -0.07 | -0.1   | -0.1  | 0.06  | 0.04    | 0.37**          | 0.23*    | 0.09     | -0.12   | 0.22*  | -0.15  |
| 4-hydroxy-L-proline               | 0.01   | -0.04 | 0.05   | -0.05 | 0.05  | -0.04   | 0.09            | -0.06    | -0.07    | 0.14    | 0.1    | -0.03  |
| L-glutamic acid                   | -0.11  | -0.03 | 0.06   | 0.08  | -0.05 | -0.02   | -0.08           | 0.03     | 0.25*    | -0.34** | 0.12   | -0.09  |
| L-proline                         | -0.14  | 0.28* | 0.22*  | 0.13  | 0.24* | 0.002   | -0.03           | 0.12     | 0.2*     | -0.02   | -0.05  | -0.12  |

Spearman's rank correlations were used and presented as Rho in the table. The first principal component scores were used to represent the pathways. \*p<0.05; \*\*p<0.005. Abbreviations: Ca, calcium; Phos, phosphorous; Mg, magnesium; PTH, intact parathyroid hormone; FGF-23, fibroblast growth factor-23; klotho, soluble klotho; dp-ucMGP, Dephosphorylated and uncarboxylated matrix Gla protein; CPP2, secondary calciprotein particle; T<sub>50</sub>, half maximal transformation of primary to secondary calciprotein particle; CRP, C-reactive protein.



## SUPPLEMENTAL FIGURES

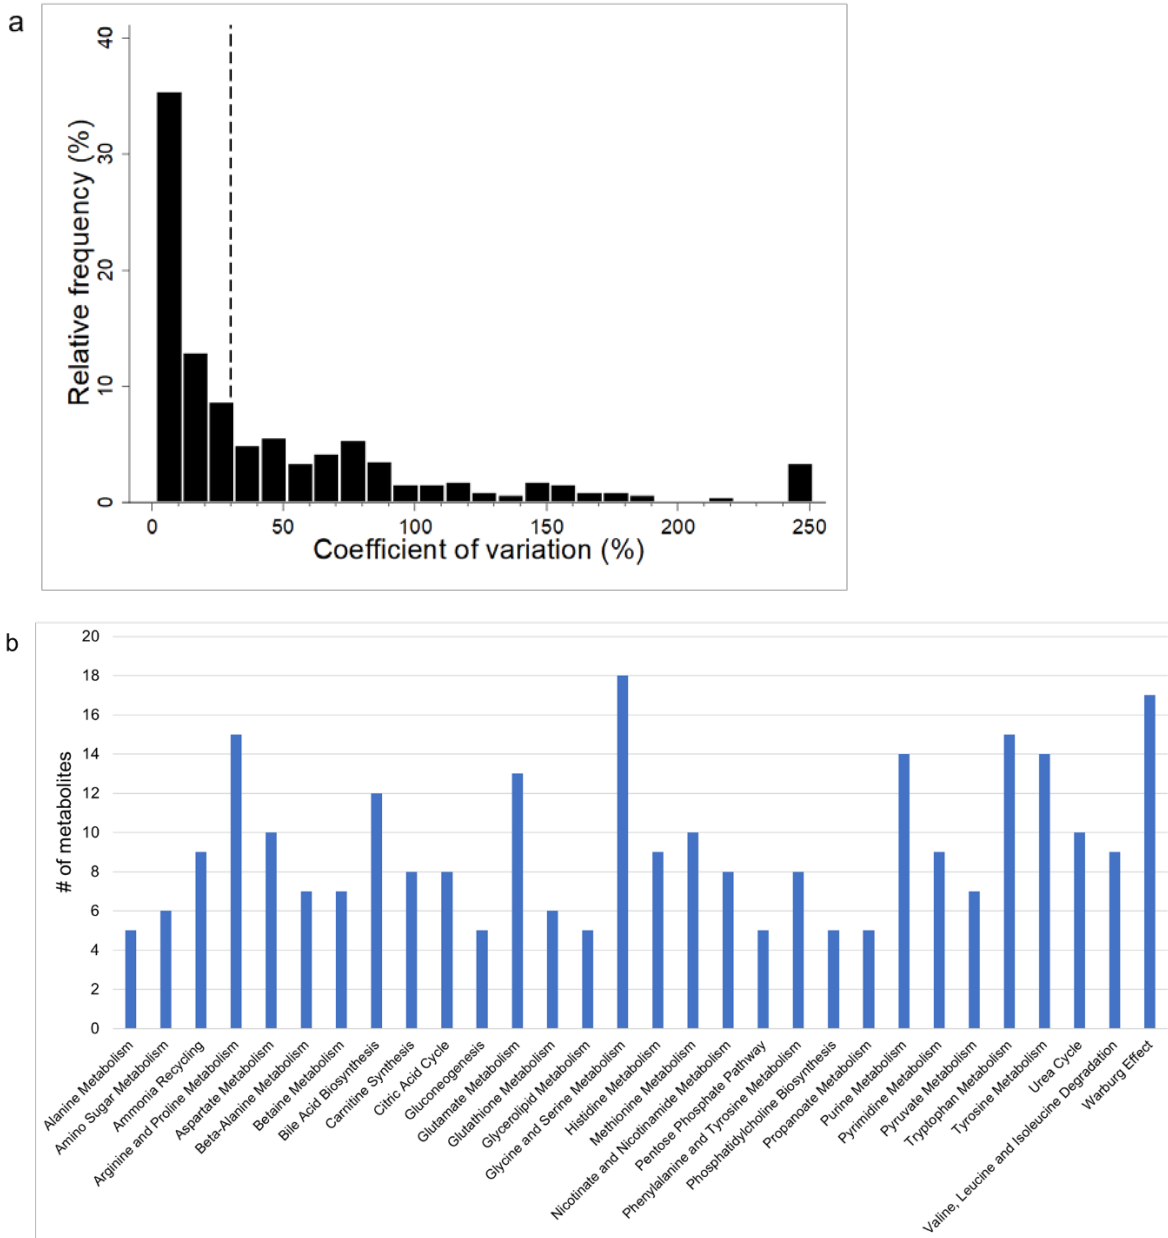

**Figure S1.** a) Distribution of coefficients of variation (CVs) for all metabolites measured (m=452). Reference line (dash line) is at CV of 30%. Approximately 55% of metabolites (m=247) had CV <30%, and were analyzed. b) Pathways and number of metabolites (m=247) analyzed. Pathways were identified using the Small Molecule Pathway Database. Only pathways that contains at least 5 metabolites analyzed are shown. Some metabolites appear in multiple pathways. The pathways that have the most metabolites measured and analyzed included glycine/serine metabolism, Warburg effect, arginine/proline metabolism, and tryptophan metabolism.

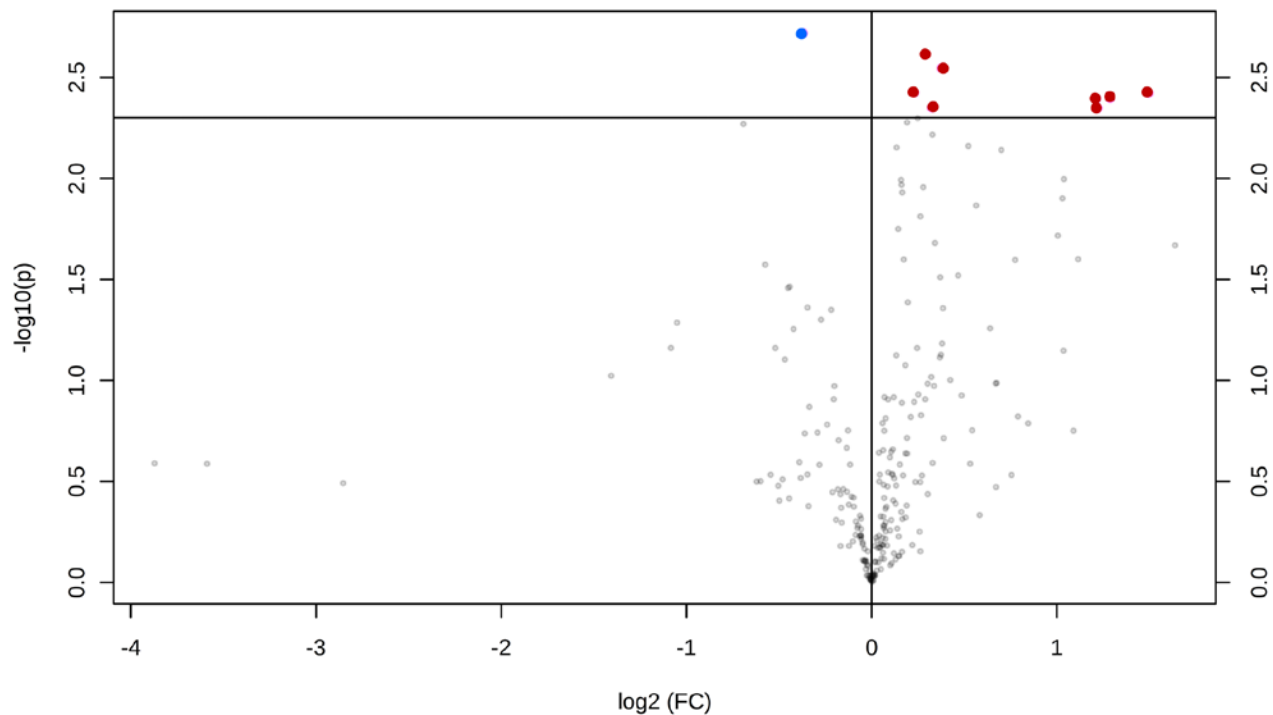

**Figure S2.** Volcano plot identified metabolites that differed between cases and controls. Compared to controls, cases had 8 metabolites that were higher in relative intensity (red dots) and 1 metabolite that was lower in relative intensity (blue dot). These metabolites and their fold differences are listed in Table S1. Mann-Whitney U tests were used with p-value threshold of <0.005 and a fold difference threshold of 1.0 to obtain approximately 10 metabolites.

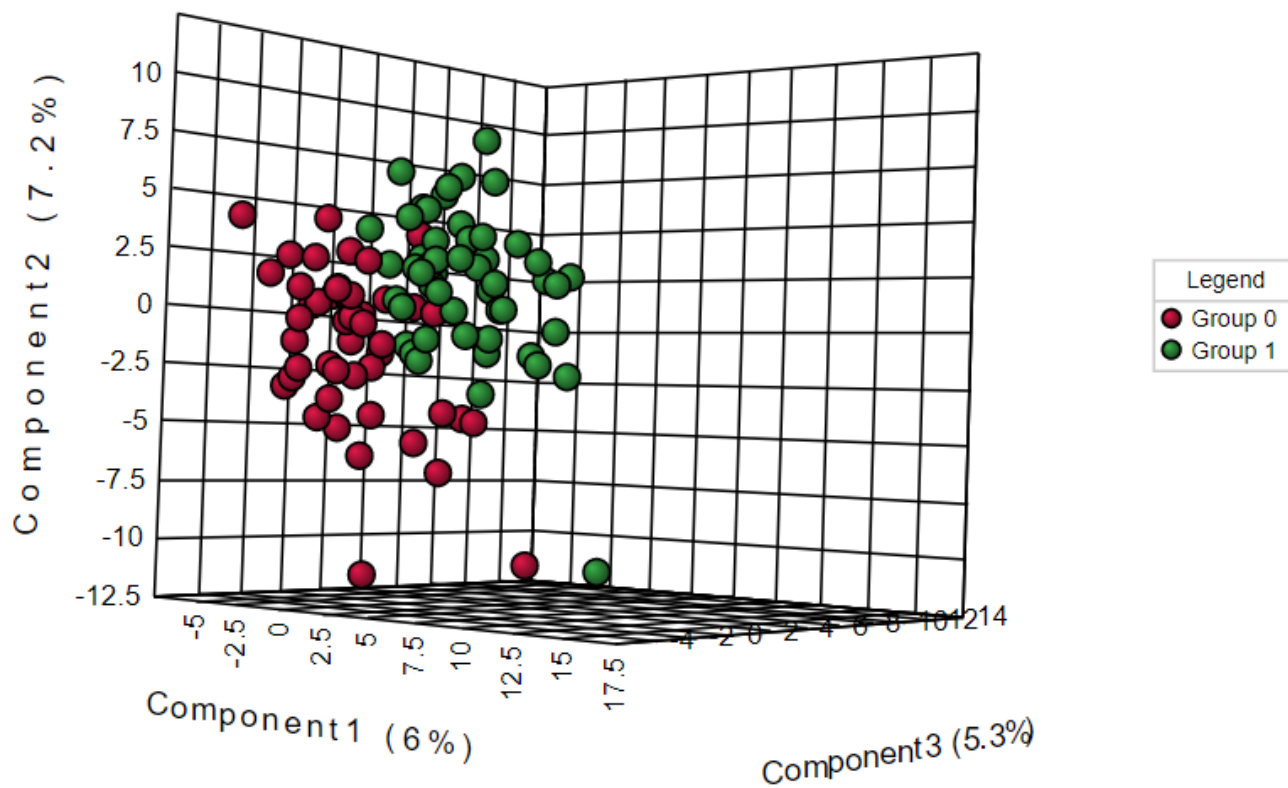

**Figure S3.** Synchronized 3-dimensional plot of partial least squares-discriminant analyses. Cases are in green and controls are in red.

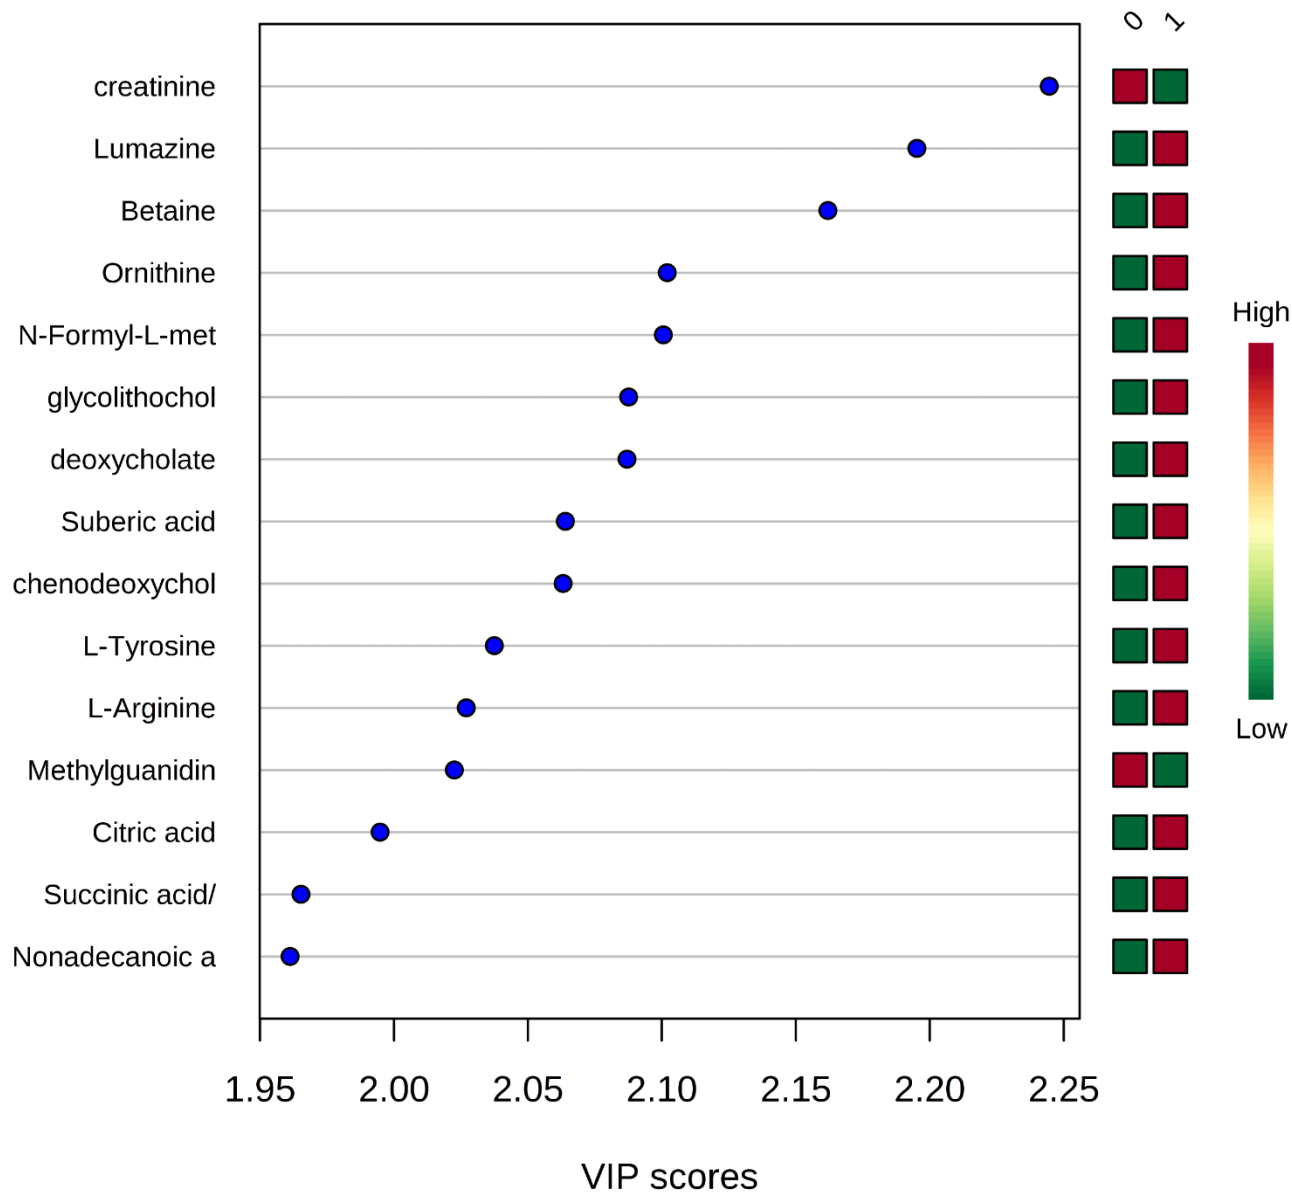

**Figure S4.** Top 15 serum metabolites listed by their Variable Importance in Projection scores (using the first principal component) using partial least squares discriminant analyses. The colored boxes on the right indicate the relative concentrations of the corresponding metabolites in cases (labeled as 1) and controls (labeled as 0). Red indicates high relative concentration and green indicates low relative concentration. Abbreviation: VIP, variable importance in project.

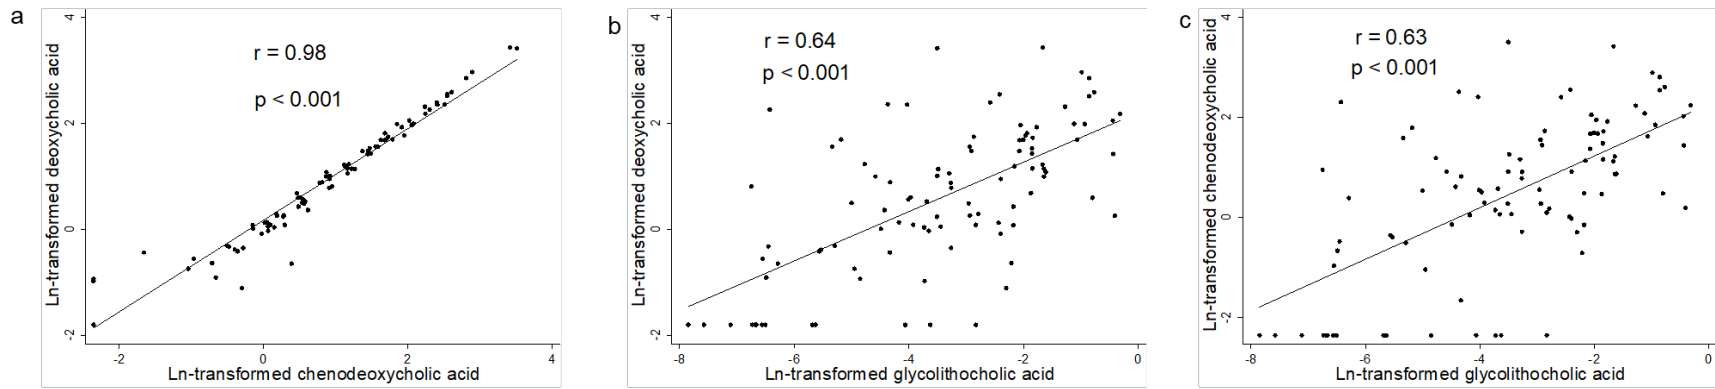

**Figure S5.** Correlation among 3 bile acids. Bile acids positively correlated with each other. Pearson Correlation was used after log-transformation of bile acid levels.

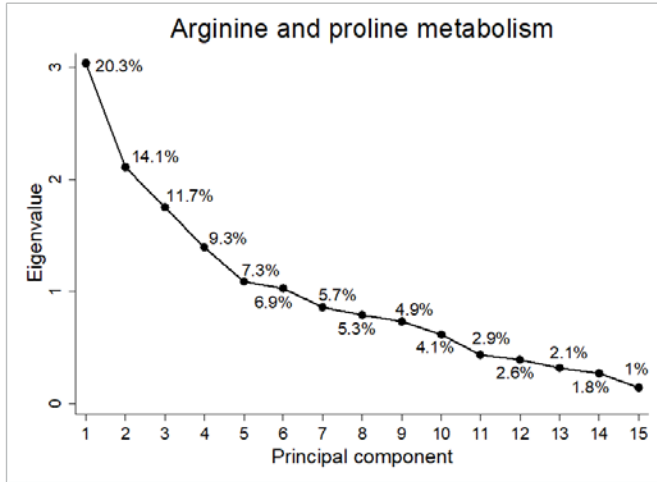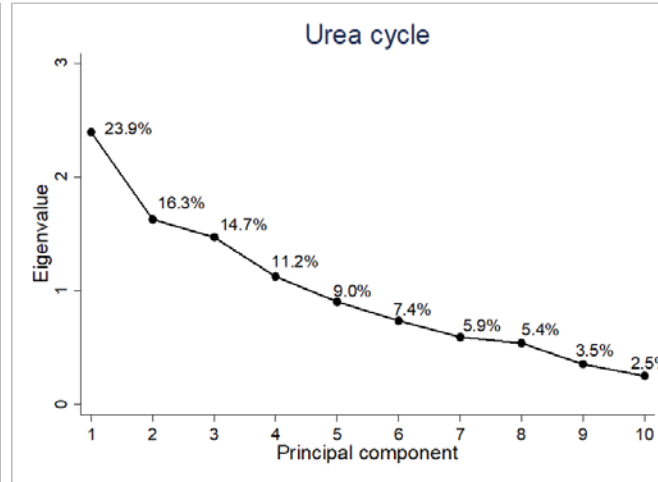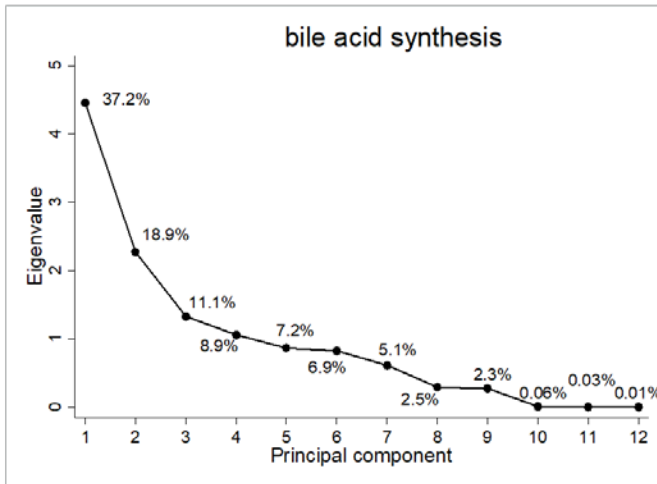

**Figure S6.** Scree plots of arginine/proline metabolism ( $m=15$ ), urea cycle ( $m=10$ ) and bile acid synthesis ( $m=12$ ). Principal component analysis was used to generate principal component scores of arginine/proline metabolism, urea cycle and bile acid synthesis. X-axis is the principal component number; y-axis is the eigenvalue. Variance explained by individual principal component is annotated on each curve.

a.

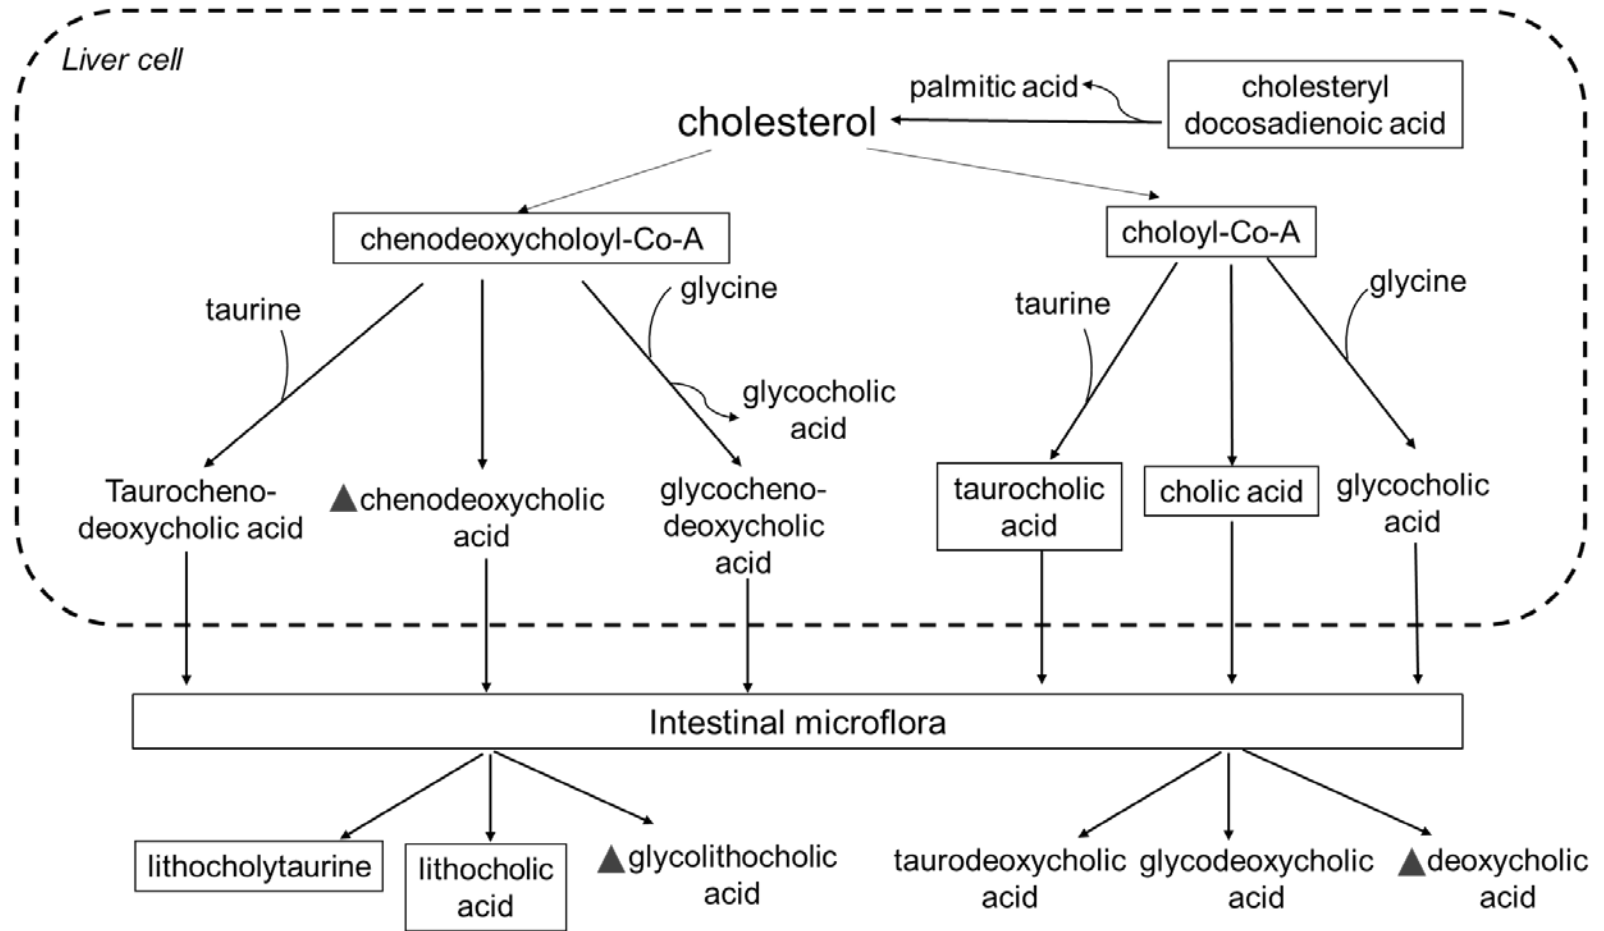

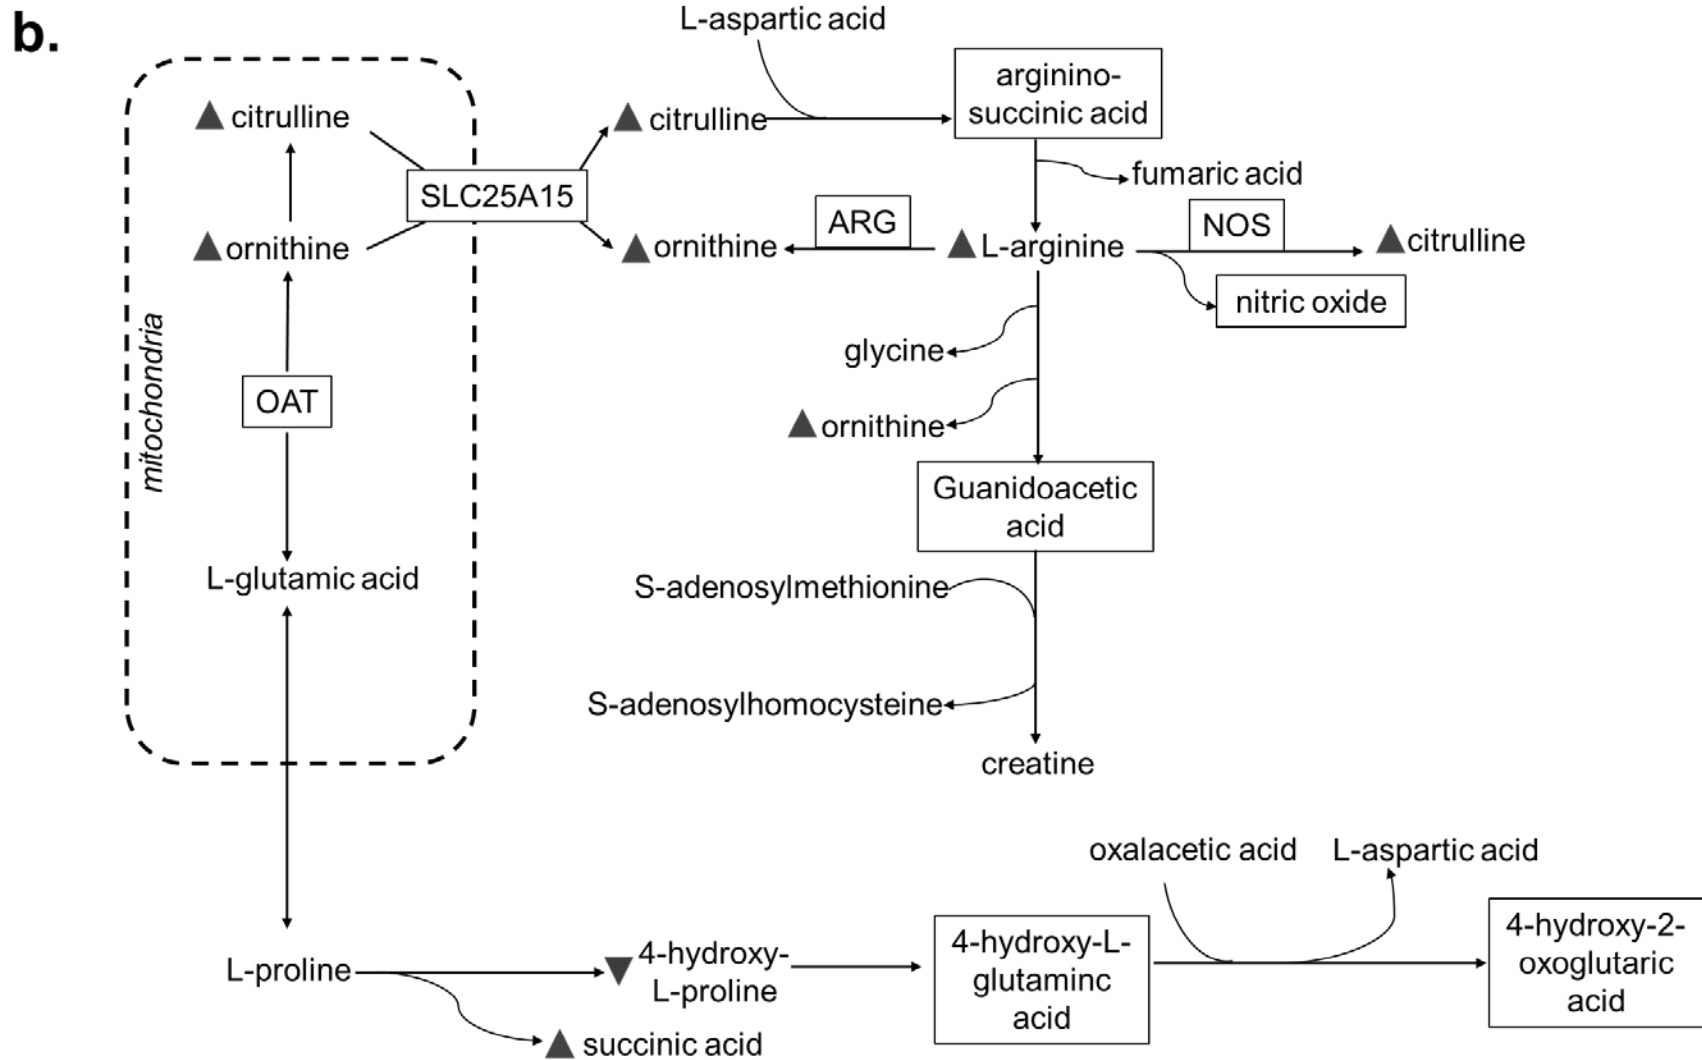

**Figure S7.** Bile acid synthesis and intracellular arginine and proline metabolism, simplified version (based on the Small Molecule Pathway Database). (a) Bile acid synthesis. Chenodeoxycholic acid is a primary bile acid as it is directly synthesized from cholesterol in liver. After being synthesized, chenodeoxycholic acid is then secreted into bile and intestinal tract, where it is converted by intestinal bacteria to lithocholic acid, which is a secondary bile acid. To increase its solubility and decrease toxicity, lithocholic acid is conjugated with glycine to form glycolithocholic acid. Cholic acid is another primary bile acid. In the intestinal tract, cholic acid is



converted to deoxycholic acid, a secondary bile acid. We found that higher levels of chenodeoxycholic, deoxycholic, and glycolithocholic acids were associated with the presence and severity of CAC. (b) Intracellular arginine and proline metabolism. Arginine/proline metabolism is one of the central pathways for the biosynthesis of arginine and proline from glutamine. We found that arginine/proline metabolism was independently associated with CAC status. Compared to controls, cases had higher levels of L-arginine, ornithine, citrulline, and succinic acid and lower levels of 4-hydroxy-L-proline ( $p < 0.05$ ). Assuming intracellular metabolism of these amino acids mirrors their extracellular metabolism and serum levels, their directionality seems to suggest that there was an increased synthesis of L-arginine and decreased metabolism of proline in participants with CAC.

Note: Metabolites that either were not measured or had a  $CV \geq 30\%$  are in boxes. The rest are metabolites analyzed. Total cholesterol level was measured separately in fasting blood samples on a non-HD day. Arrowheads ( $\blacktriangle \blacktriangledown$ ) indicate the directionality when comparing the cases with controls ( $p < 0.05$ ). Abbreviations: OAT, ornithine aminotransferase; SLC25A15, mitochondrial ornithine transporter 1; ARG, arginase; NOS, nitric oxide synthase.

## REFERENCES

1. Parekh RS, Meoni LA, Jaar BG, et al. Rationale and design for the Predictors of Arrhythmic and Cardiovascular Risk in End Stage Renal Disease (PACE) study. *BMC nephrology*. 2015;16:63.
2. Bucay N, Sarosi I, Dunstan CR, et al. osteoprotegerin-deficient mice develop early onset osteoporosis and arterial calcification. *Genes & development*. 1998;12(9):1260-1268.
3. Schurgers LJ, Barreto DV, Barreto FC, et al. The circulating inactive form of matrix gla protein is a surrogate marker for vascular calcification in chronic kidney disease: a preliminary report. *Clinical journal of the American Society of Nephrology : CJASN*. 2010;5(4):568-575.
4. Luo G, Ducy P, McKee MD, et al. Spontaneous calcification of arteries and cartilage in mice lacking matrix GLA protein. *Nature*. 1997;386(6620):78-81.
5. Schafer C, Heiss A, Schwarz A, et al. The serum protein alpha 2-Heremans-Schmid glycoprotein/fetuin-A is a systemically acting inhibitor of ectopic calcification. *The Journal of clinical investigation*. 2003;112(3):357-366.
6. Chen W, Anokhina V, Dieudonne G, et al. Patients with advanced chronic kidney disease and vascular calcification have a large hydrodynamic radius of secondary calciprotein particles. *Nephrology, dialysis, transplantation : official publication of the European Dialysis and Transplant Association - European Renal Association*. 2019;34(6):992-1000.
